# Supplementary material
Source: PubMed Central journal article supplement (PMC2783430)
Supplement: NIHMS140337-supplement-1.pdf [file NIHMS140337-supplement-1.pdf]

| Progressive Disease Signature               |              |                                                                                                 |
|---------------------------------------------|--------------|-------------------------------------------------------------------------------------------------|
| Upregulated probes with progressive disease |              |                                                                                                 |
| U133Plus2 ID                                | Gene Symbol  | Gene Name                                                                                       |
| 239673_at                                   | NR3C2        | nuclear receptor subfamily 3, group C, member 2                                                 |
| 228994_at                                   | CCDC24       | coiled-coil domain containing 24                                                                |
| 1562245_a_at                                | ZNF578       | zinc finger protein 578                                                                         |
| 234224_at                                   | PTPRG        | protein tyrosine phosphatase, receptor type, G                                                  |
| 219173_at                                   | NA           | NA                                                                                              |
| 218613_at                                   | PSD3         | pleckstrin and Sec7 domain containing 3                                                         |
| 236167_at                                   | TNS3         | tensin 3                                                                                        |
| 1562244_at                                  | ZNF578       | zinc finger protein 578                                                                         |
| 221909_at                                   | RNFT2        | ring finger protein, transmembrane 2                                                            |
| 1552732_at                                  | ABRA         | actin-binding Rho activating protein                                                            |
| 59375_at                                    | MYO15B       | myosin XVb pseudogene                                                                           |
| 203633_at                                   | CPT1A        | carnitine palmitoyltransferase 1A (liver)                                                       |
| 1563120_at                                  | NA           | NA                                                                                              |
| 1560098_at                                  | AKR1C2       | aldo-keto reductase family 1, member C2 (dihydrodiol dehydrogenase 2; bile acid binding pr      |
| 238576_at                                   | NA           | NA                                                                                              |
| 202283_at                                   | SERPINF1     | serpin peptidase inhibitor, clade F (alpha-2 antiplasmin, pigment epithelium derived factor), r |
| 214248_s_at                                 | TRIM2        | tripartite motif-containing 2                                                                   |
| 204766_s_at                                 | NUDT1        | nudix (nucleoside diphosphate linked moiety X)-type motif 1                                     |
| 242308_at                                   | MCOLN3       | mucolipin 3                                                                                     |
| 1569154_a_at                                | NA           | NA                                                                                              |
| 228171_s_at                                 | PLEKHG4      | pleckstrin homology domain containing, family G (with RhoGef domain) member 4                   |
| 1552587_at                                  | CNBD1        | cyclic nucleotide binding domain containing 1                                                   |
| 220705_s_at                                 | ADAMTS7      | ADAM metalloproteinase with thrombospondin type 1 motif, 7                                      |
| 232332_at                                   | RP13-347D8.3 | KIAA1210 protein                                                                                |
| 1553618_at                                  | TRIM43       | tripartite motif-containing 43                                                                  |
| 209369_at                                   | ANXA3        | annexin A3                                                                                      |
| 243143_at                                   | FAM24A       | family with sequence similarity 24, member A                                                    |
| 234742_at                                   | SIRPG        | signal-regulatory protein gamma                                                                 |
| 229628_s_at                                 | KIAA1529     | KIAA1529                                                                                        |
| 234600_at                                   | MTM1         | myotubularin 1                                                                                  |
| 216882_s_at                                 | NEBL         | nebullette                                                                                      |
| 234934_at                                   | C20orf74     | chromosome 20 open reading frame 74                                                             |
| 1562562_at                                  | FLJ40759     | hypothetical gene supported by AK098078                                                         |
| 227182_at                                   | SUSD3        | sushi domain containing 3                                                                       |
| 206774_at                                   | FRMPD1       | FERM and PDZ domain containing 1                                                                |
| 224223_s_at                                 | PDE11A       | phosphodiesterase 11A                                                                           |
| 212772_s_at                                 | ABCA2        | ATP-binding cassette, sub-family A (ABC1), member 2                                             |
| 233478_at                                   | PLCXD2       | phosphatidylinositol-specific phospholipase C, X domain containing 2                            |
| 203658_at                                   | SLC25A20     | solute carrier family 25 (carnitine/acylcarnitine translocase), member 20                       |
| 234725_s_at                                 | SEMA4B       | sema domain, immunoglobulin domain (Ig), transmembrane domain (TM) and short cytoplas           |
| 244859_at                                   | PDE4DIP      | phosphodiesterase 4D interacting protein (myomegalin)                                           |
| 217914_at                                   | TPCN1        | two pore segment channel 1                                                                      |
| 1553123_at                                  | WDR62        | WD repeat domain 62                                                                             |
| 208253_at                                   | SIGLEC8      | sialic acid binding Ig-like lectin 8                                                            |
| 217312_s_at                                 | COL7A1       | collagen, type VII, alpha 1 (epidermolysis bullosa, dystrophic, dominant and recessive)         |
| 215302_at                                   | LOC257152    | hypothetical protein LOC257152                                                                  |
| 1561154_at                                  | GBF1         | golgi-specific brefeldin A resistance factor 1                                                  |
| 232766_at                                   | BANF2        | barrier to autointegration factor 2                                                             |
| 206699_x_at                                 | NPAS1        | neuronal PAS domain protein 1                                                                   |
| 232756_at                                   | KALRN        | kalirin, RhoGEF kinase                                                                          |
| 242500_at                                   | NA           | NA                                                                                              |
| 1560043_at                                  | CYB5R1       | cytochrome b5 reductase 1                                                                       |
| 207082_at                                   | CSF1         | colony stimulating factor 1 (macrophage)                                                        |
| 214339_s_at                                 | MAP4K1       | mitogen-activated protein kinase kinase kinase kinase 1                                         |
| 216917_s_at                                 | SYCP1        | synaptonemal complex protein 1                                                                  |
| 1553209_at                                  | RNFT2        | ring finger protein, transmembrane 2                                                            |
| 230640_at                                   | PRPF40B      | PRP40 pre-mRNA processing factor 40 homolog B (S. cerevisiae)                                   |
| 218369_s_at                                 | EXOSC1       | exosome component 1                                                                             |
| 207848_at                                   | AVP          | arginine vasopressin (neurophysin II, antidiuretic hormone, diabetes insipidus, neurohypophy    |
| 231937_at                                   | NA           | NA                                                                                              |
| 218153_at                                   | CARS2        | cysteinyI-tRNA synthetase 2, mitochondrial (putative)                                           |
| 209500_x_at                                 | TNFSF13      | tumor necrosis factor (ligand) superfamily, member 13                                           |
| 220998_s_at                                 | UNC93B1      | unc-93 homolog B1 (C. elegans)                                                                  |
| 218908_at                                   | ASPSCR1      | alveolar soft part sarcoma chromosome region, candidate 1                                       |
| 219577_s_at                                 | ABCA7        | ATP-binding cassette, sub-family A (ABC1), member 7                                             |
| 635_s_at                                    | PPP2R5B      | protein phosphatase 2, regulatory subunit B', beta isoform                                      |
| 226959_at                                   | LOC283070    | hypothetical protein LOC283070                                                                  |
| 1557682_a_at                                | RP11-297H3.4 | hypothetical protein LOC284688                                                                  |
| 236295_s_at                                 | NLRC3        | NLR family, CARD domain containing 3                                                            |
| 237917_at                                   | NBPF8        | neuroblastoma breakpoint family, member 8                                                       |

| 225704_at                                            | KIAA1545    | KIAA1545 protein                                                                   |  |
|------------------------------------------------------|-------------|------------------------------------------------------------------------------------|--|
| 229597_s_at                                          | WDFY4       | WDFY family member 4                                                               |  |
| 202205_at                                            | VASP        | vasodilator-stimulated phosphoprotein                                              |  |
| 203181_x_at                                          | SRPK2       | SFRS protein kinase 2                                                              |  |
| 202765_s_at                                          | FBN1        | fibrillin 1                                                                        |  |
| 221240_s_at                                          | B3GNT4      | UDP-GlcNAc:betaGal beta-1,3-N-acetylglucosaminyltransferase 4                      |  |
| 207522_s_at                                          | ATP2A3      | ATPase, Ca++ transporting, ubiquitous                                              |  |
| 204919_at                                            | PRR4        | proline rich 4 (lacrimal)                                                          |  |
| 208138_at                                            | GAST        | gastrin                                                                            |  |
| 209413_at                                            | B4GALT2     | UDP-Gal:betaGlcNAc beta 1,4- galactosyltransferase, polypeptide 2                  |  |
| 213036_x_at                                          | ATP2A3      | ATPase, Ca++ transporting, ubiquitous                                              |  |
| 209765_at                                            | ADAM19      | ADAM metalloproteinase domain 19 (meltrin beta)                                    |  |
| 222268_x_at                                          | MUC5B       | mucin 5B, oligomeric mucus/gel-forming                                             |  |
| 207250_at                                            | SIX6        | SIX homeobox 6                                                                     |  |
| 218654_s_at                                          | MRPS33      | mitochondrial ribosomal protein S33                                                |  |
| 1554205_s_at                                         | ICA1L       | islet cell autoantigen 1,69kDa-like                                                |  |
| 207825_s_at                                          | GHRHR       | growth hormone releasing hormone receptor                                          |  |
| 40569_at                                             | MZF1        | myeloid zinc finger 1                                                              |  |
| 220371_s_at                                          | SLC12A9     | solute carrier family 12 (potassium/chloride transporters), member 9               |  |
| 209166_s_at                                          | MAN2B1      | mannosidase, alpha, class 2B, member 1                                             |  |
| 213402_at                                            | ZNF787      | zinc finger protein 787                                                            |  |
| 234359_at                                            | NA          | NA                                                                                 |  |
| 211036_x_at                                          | ANAPC5      | anaphase promoting complex subunit 5                                               |  |
| 221080_s_at                                          | DENND1C     | DENN/MADD domain containing 1C                                                     |  |
| 229572_at                                            | NA          | NA                                                                                 |  |
| 90610_at                                             | LRCH4       | leucine-rich repeats and calponin homology (CH) domain containing 4                |  |
| 221056_x_at                                          | EPS15L1     | epidermal growth factor receptor pathway substrate 15-like 1                       |  |
| 213947_s_at                                          | NUP210      | nucleoporin 210kDa                                                                 |  |
| 219486_at                                            | DUS2L       | dihydrouridine synthase 2-like, SMM1 homolog (S. cerevisiae)                       |  |
| 209650_s_at                                          | TBC1D22A    | TBC1 domain family, member 22A                                                     |  |
| 214246_x_at                                          | MINK1       | misshapen-like kinase 1 (zebrafish)                                                |  |
| 239855_at                                            | PPM1L       | protein phosphatase 1 (formerly 2C)-like                                           |  |
| 214426_x_at                                          | CHAF1A      | chromatin assembly factor 1, subunit A (p150)                                      |  |
| 218052_s_at                                          | ATP13A1     | ATPase type 13A1                                                                   |  |
| 217729_s_at                                          | AES         | amino-terminal enhancer of split                                                   |  |
| 218387_s_at                                          | PGLS        | 6-phosphogluconolactonase                                                          |  |
| 218220_at                                            | C12orf10    | chromosome 12 open reading frame 10                                                |  |
| 1562449_s_at                                         | LARGE       | like-glycosyltransferase                                                           |  |
|                                                      |             |                                                                                    |  |
|                                                      |             |                                                                                    |  |
| <b>Downregulated probes with progressive disease</b> |             |                                                                                    |  |
| U133Plus2 ID                                         | Gene Symbol | Gene Name                                                                          |  |
| 225386_s_at                                          | HNRPLL      | heterogeneous nuclear ribonucleoprotein L-like                                     |  |
| 228530_at                                            | RP11-11C5.2 | similar to RIKEN cDNA 2410129H14                                                   |  |
| 237897_at                                            | ADAM17      | ADAM metalloproteinase domain 17 (tumor necrosis factor, alpha, converting enzyme) |  |
| 1566973_at                                           | NA          | NA                                                                                 |  |
| 233316_at                                            | MKLN1       | muskelin 1, intracellular mediator containing kelch motifs                         |  |
| 1555227_a_at                                         | MANEA       | mannosidase, endo-alpha                                                            |  |
| 223579_s_at                                          | APOB        | apolipoprotein B (including Ag(x) antigen)                                         |  |
| 221276_s_at                                          | SYNC1       | syncoilin, intermediate filament 1                                                 |  |
| 232230_at                                            | C10orf75    | chromosome 10 open reading frame 75                                                |  |
| 216047_x_at                                          | SEZ6L       | seizure related 6 homolog (mouse)-like                                             |  |
| 209532_at                                            | PLAA        | phospholipase A2-activating protein                                                |  |
| 238552_at                                            | SRPK2       | SFRS protein kinase 2                                                              |  |
| 1559990_at                                           | LOC283070   | hypothetical protein LOC283070                                                     |  |
| 202063_s_at                                          | SEL1L       | sel-1 suppressor of lin-12-like (C. elegans)                                       |  |
| 1570441_at                                           | NAPB        | N-ethylmaleimide-sensitive factor attachment protein, beta                         |  |
| 204898_at                                            | SAP30       | Sin3A-associated protein, 30kDa                                                    |  |
| 219858_s_at                                          | FLJ20160    | FLJ20160 protein                                                                   |  |
| 239172_x_at                                          | MDFIC       | MyoD family inhibitor domain containing                                            |  |
| 226187_at                                            | CDS1        | CDP-diacylglycerol synthase (phosphatidate cytidyltransferase) 1                   |  |
| 206265_s_at                                          | GPLD1       | glycosylphosphatidylinositol specific phospholipase D1                             |  |
| 229411_at                                            | PNCK        | pregnancy upregulated non-ubiquitously expressed CaM kinase                        |  |
| 211514_at                                            | RIPK5       | receptor interacting protein kinase 5                                              |  |
| 220302_at                                            | MAK         | male germ cell-associated kinase                                                   |  |
| 1560161_at                                           | CCNB2       | cyclin B2                                                                          |  |
| 221936_x_at                                          | MRPL41      | mitochondrial ribosomal protein L41                                                |  |
| 224274_at                                            | FSCB        | fibrous sheath CABYR binding protein                                               |  |
| 217594_at                                            | ZCCHC11     | zinc finger, CCHC domain containing 11                                             |  |
| 231869_at                                            | ZNF451      | zinc finger protein 451                                                            |  |
| 239729_at                                            | NA          | NA                                                                                 |  |
| 222901_s_at                                          | KCNJ16      | potassium inwardly-rectifying channel, subfamily J, member 16                      |  |
| 212675_s_at                                          | CEP68       | centrosomal protein 68kDa                                                          |  |
| 233556_at                                            | CRYBB2P1    | crystallin, beta B2 pseudogene 1                                                   |  |

| <b>Chlorambucil Signature</b>                          |             |                                                                                               |
|--------------------------------------------------------|-------------|-----------------------------------------------------------------------------------------------|
| <b>Upregulated probes with chlorambucil resistance</b> |             |                                                                                               |
| U133A ID                                               | Gene Symbol | Gene Name                                                                                     |
| 200606_at                                              | DSP         | desmoplakin                                                                                   |
| 200627_at                                              | PTGES3      | prostaglandin E synthase 3 (cytosolic)                                                        |
| 200708_at                                              | GOT2        | glutamic-oxaloacetic transaminase 2, mitochondrial (aspartate aminotransferase 2)             |
| 200860_s_at                                            | CNOT1       | CCR4-NOT transcription complex, subunit 1                                                     |
| 200861_at                                              | CNOT1       | CCR4-NOT transcription complex, subunit 1                                                     |
| 201015_s_at                                            | JUP         | junction plakoglobin                                                                          |
| 201499_s_at                                            | USP7        | ubiquitin specific peptidase 7 (herpes virus-associated)                                      |
| 201596_x_at                                            | KRT18       | keratin 18                                                                                    |
| 201839_s_at                                            | TACSTD1     | tumor-associated calcium signal transducer 1                                                  |
| 201872_s_at                                            | ABCE1       | ATP-binding cassette, sub-family E (OABP), member 1                                           |
| 201873_s_at                                            | ABCE1       | ATP-binding cassette, sub-family E (OABP), member 1                                           |
| 202107_s_at                                            | MCM2        | MCM2 minichromosome maintenance deficient 2, mitotin ( <i>S. cerevisiae</i> )                 |
| 202521_at                                              | CTCF        | CCCTC-binding factor (zinc finger protein)                                                    |
| 202560_s_at                                            | C1orf77     | chromosome 1 open reading frame 77                                                            |
| 202790_at                                              | CLDN7       | claudin 7                                                                                     |
| 202890_at                                              | MAP7        | microtubule-associated protein 7                                                              |
| 203209_at                                              | RFC5        | replication factor C (activator 1) 5, 36.5kDa                                                 |
| 203219_s_at                                            | APRT        | adenine phosphoribosyltransferase                                                             |
| 203244_at                                              | PEX5        | peroxisomal biogenesis factor 5                                                               |
| 203407_at                                              | PPL         | periplakin                                                                                    |
| 203713_s_at                                            | LLGL2       | lethal giant larvae homolog 2 ( <i>Drosophila</i> )                                           |
| 203837_at                                              | MAP3K5      | mitogen-activated protein kinase kinase kinase 5                                              |
| 203953_s_at                                            | CLDN3       | claudin 3                                                                                     |
| 203954_x_at                                            | CLDN3       | claudin 3                                                                                     |
| 204679_at                                              | KCNK1       | potassium channel, subfamily K, member 1                                                      |
| 205768_s_at                                            | SLC27A2     | solute carrier family 27 (fatty acid transporter), member 2                                   |
| 205769_at                                              | SLC27A2     | solute carrier family 27 (fatty acid transporter), member 2                                   |
| 205909_at                                              | POLE2       | polymerase (DNA directed), epsilon 2 (p59 subunit)                                            |
| 206687_s_at                                            | PTPN6       | protein tyrosine phosphatase, non-receptor type 6                                             |
| 207717_s_at                                            | PKP2        | plakophilin 2                                                                                 |
| 208714_at                                              | NDUFV1      | NADH dehydrogenase (ubiquinone) flavoprotein 1, 51kDa                                         |
| 209008_x_at                                            | KRT8        | keratin 8                                                                                     |
| 209016_s_at                                            | KRT7        | keratin 7                                                                                     |
| 209260_at                                              | SFN         | stratifin                                                                                     |
| 209323_at                                              | PRKRIR      | protein-kinase, interferon-inducible double stranded RNA dependent inhibitor, repressor of (P |
| 209759_s_at                                            | DCI         | dodecenoyl-Coenzyme A delta isomerase (3,2 trans-enoyl-Coenzyme A isomerase)                  |
| 209784_s_at                                            | JAG2        | jagged 2                                                                                      |
| 209832_s_at                                            | CDT1        | chromatin licensing and DNA replication factor 1                                              |
| 209873_s_at                                            | PKP3        | plakophilin 3                                                                                 |
| 210150_s_at                                            | LAMA5       | laminin, alpha 5                                                                              |
| 210715_s_at                                            | SPINT2      | serine peptidase inhibitor, Kunitz type, 2                                                    |
| 211376_s_at                                            | C10orf86    | chromosome 10 open reading frame 86                                                           |
| 212316_at                                              | NUP210      | nucleoporin 210kDa                                                                            |
| 212443_at                                              | NBEAL2      | neurobeachin-like 2                                                                           |
| 212925_at                                              | C19orf21    | chromosome 19 open reading frame 21                                                           |
| 213892_s_at                                            | APRT        | adenine phosphoribosyltransferase                                                             |
| 213913_s_at                                            | KIAA0984    | NA                                                                                            |
| 213929_at                                              | NA          | NA                                                                                            |
| 214734_at                                              | EXPH5       | exophilin 5                                                                                   |
| 215243_s_at                                            | GJB3        | gap junction protein, beta 3, 31kDa (connexin 31)                                             |
| 215747_s_at                                            | RCC1        | regulator of chromosome condensation 1                                                        |
| 217872_at                                              | NOP17       | NOP17                                                                                         |
| 218101_s_at                                            | NDUFC2      | NADH dehydrogenase (ubiquinone) 1, subcomplex unknown, 2, 14.5kDa                             |
| 218416_s_at                                            | FLJ20489    | NA                                                                                            |
| 218493_at                                              | C16orf33    | chromosome 16 open reading frame 33                                                           |
| 218768_at                                              | NUP107      | nucleoporin 107kDa                                                                            |
| 218966_at                                              | MYO5C       | myosin VC                                                                                     |
| 219067_s_at                                            | C10orf86    | chromosome 10 open reading frame 86                                                           |
| 219084_at                                              | NSD1        | nuclear receptor binding SET domain protein 1                                                 |
| 219395_at                                              | RBM35B      | RNA binding motif protein 35B                                                                 |
| 219467_at                                              | FLJ20125    | NA                                                                                            |
| 219562_at                                              | RAB26       | RAB26, member RAS oncogene family                                                             |
| 219580_s_at                                            | TMC5        | transmembrane channel-like 5                                                                  |
| 219707_at                                              | CPNE7       | copine VII                                                                                    |
| 219709_x_at                                            | C16orf24    | chromosome 16 open reading frame 24                                                           |
| 220035_at                                              | NUP210      | nucleoporin 210kDa                                                                            |
| 220175_s_at                                            | CBWD2       | COBW domain containing 2                                                                      |
| 220520_s_at                                            | NUP62CL     | nucleoporin 62kDa C-terminal like                                                             |
| 221521_s_at                                            | GINS2       | GINS complex subunit 2 (Psf2 homolog)                                                         |
| 221622_s_at                                            | TMEM126B    | transmembrane protein 126B                                                                    |

|                                                          |                          |                                                                                        |  |
|----------------------------------------------------------|--------------------------|----------------------------------------------------------------------------------------|--|
| 31846_at                                                 | RHOD                     | ras homolog gene family, member D                                                      |  |
| 32137_at                                                 | JAG2                     | jagged 2                                                                               |  |
| 33322_i_at                                               | SFN                      | stratifin                                                                              |  |
| 33323_r_at                                               | SFN                      | stratifin                                                                              |  |
| 37117_at                                                 | ARHGAP8                  | Rho GTPase activating protein 8                                                        |  |
| 60474_at                                                 | C20orf42                 | chromosome 20 open reading frame 42                                                    |  |
| 89948_at                                                 | C20orf67                 | chromosome 20 open reading frame 67                                                    |  |
|                                                          |                          |                                                                                        |  |
|                                                          |                          |                                                                                        |  |
|                                                          |                          |                                                                                        |  |
|                                                          |                          |                                                                                        |  |
|                                                          |                          |                                                                                        |  |
|                                                          |                          |                                                                                        |  |
| <b>Downregulated probes with chlorambucil resistance</b> |                          |                                                                                        |  |
| U133A ID                                                 | Gene Symbol              | Gene Name                                                                              |  |
| 160020_at                                                | MMP14                    | matrix metalloproteinase 14 (membrane-inserted)                                        |  |
| 200096_s_at                                              | ATP6V0E                  | ATPase, H+ transporting, lysosomal 9kDa, V0 subunit e                                  |  |
| 200665_s_at                                              | SPARC                    | secreted protein, acidic, cysteine-rich (osteonectin)                                  |  |
| 200755_s_at                                              | CALU                     | calumenin                                                                              |  |
| 200756_x_at                                              | CALU                     | calumenin                                                                              |  |
| 200757_s_at                                              | CALU                     | calumenin                                                                              |  |
| 200787_s_at                                              | PEA15                    | phosphoprotein enriched in astrocytes 15                                               |  |
| 200788_s_at                                              | PEA15                    | phosphoprotein enriched in astrocytes 15                                               |  |
| 201069_at                                                | MMP2                     | matrix metalloproteinase 2 (gelatinase A, 72kDa gelatinase, 72kDa type IV collagenase) |  |
| 201393_s_at                                              | IGF2R                    | insulin-like growth factor 2 receptor                                                  |  |
| 201615_x_at                                              | CALD1                    | caldesmon 1                                                                            |  |
| 201616_s_at                                              | CALD1                    | caldesmon 1                                                                            |  |
| 201617_x_at                                              | CALD1                    | caldesmon 1                                                                            |  |
| 201744_s_at                                              | LUM                      | lumican                                                                                |  |
| 201809_s_at                                              | ENG                      | endoglin (Osler-Rendu-Weber syndrome 1)                                                |  |
| 202124_s_at                                              | TRAK2                    | trafficking protein, kinesin binding 2                                                 |  |
| 202440_s_at                                              | ST5                      | suppression of tumorigenicity 5                                                        |  |
| 202827_s_at                                              | MMP14                    | matrix metalloproteinase 14 (membrane-inserted)                                        |  |
| 202828_s_at                                              | MMP14                    | matrix metalloproteinase 14 (membrane-inserted)                                        |  |
| 203603_s_at                                              | ZFX1B                    | zinc finger homeobox 1b                                                                |  |
| 203827_at                                                | WIPI1                    | WD repeat domain, phosphoinositide interacting 1                                       |  |
| 204823_at                                                | NAV3                     | neuron navigator 3                                                                     |  |
| 204881_s_at                                              | UGCG                     | UDP-glucose ceramide glucosyltransferase                                               |  |
| 204955_at                                                | SRPX                     | sushi-repeat-containing protein, X-linked                                              |  |
| 205173_x_at                                              | CD58                     | CD58 molecule                                                                          |  |
| 205717_x_at                                              | PCDHGC3                  | protocadherin gamma subfamily C, 3                                                     |  |
| 206070_s_at                                              | EPHA3                    | EPH receptor A3                                                                        |  |
| 207431_s_at                                              | DEGS1                    | degenerative spermatocyte homolog 1, lipid desaturase (Drosophila)                     |  |
| 207749_s_at                                              | PPP2R3A                  | protein phosphatase 2 (formerly 2A), regulatory subunit B'', alpha                     |  |
| 208475_at                                                | FRMD4A                   | FERM domain containing 4A                                                              |  |
| 208682_s_at                                              | MAGED2                   | melanoma antigen family D, 2                                                           |  |
| 208960_s_at                                              | KLF6                     | Kruppel-like factor 6                                                                  |  |
| 209079_x_at                                              | PCDHGA1                  | protocadherin gamma subfamily A, 1                                                     |  |
| 209420_s_at                                              | SMPD1                    | sphingomyelin phosphodiesterase 1, acid lysosomal (acid sphingomyelinase)              |  |
| 209721_s_at                                              | HOM- <del>TES</del> -103 | NA                                                                                     |  |
| 209859_at                                                | TRIM9                    | tripartite motif-containing 9                                                          |  |
| 211066_x_at                                              | PCDHGC3                  | protocadherin gamma subfamily C, 3                                                     |  |
| 211744_s_at                                              | CD58                     | CD58 molecule                                                                          |  |
| 211876_x_at                                              | PCDHGA11                 | protocadherin gamma subfamily A, 11                                                    |  |
| 212077_at                                                | CALD1                    | caldesmon 1                                                                            |  |
| 212119_at                                                | RHOQ                     | ras homolog gene family, member Q                                                      |  |
| 212120_at                                                | PIGF                     | phosphatidylinositol glycan anchor biosynthesis, class F                               |  |
| 212122_at                                                | PIGF                     | phosphatidylinositol glycan anchor biosynthesis, class F                               |  |
| 212667_at                                                | SPARC                    | secreted protein, acidic, cysteine-rich (osteonectin)                                  |  |
| 213002_at                                                | MARCKS                   | myristoylated alanine-rich protein kinase C substrate                                  |  |
| 213069_at                                                | HEG1                     | HEG homolog 1 (zebrafish)                                                              |  |
| 213627_at                                                | MAGED2                   | melanoma antigen family D, 2                                                           |  |
| 213831_at                                                | HLA-DQA1                 | major histocompatibility complex, class II, DQ alpha 1                                 |  |
| 213836_s_at                                              | WIPI1                    | WD repeat domain, phosphoinositide interacting 1                                       |  |
| 214845_s_at                                              | CALU                     | calumenin                                                                              |  |
| 214880_x_at                                              | CALD1                    | caldesmon 1                                                                            |  |
| 215836_s_at                                              | PCDHGC3                  | protocadherin gamma subfamily C, 3                                                     |  |
| 216942_s_at                                              | CD58                     | CD58 molecule                                                                          |  |
| 217943_s_at                                              | RPRC1                    | arginine/proline rich coiled-coil 1                                                    |  |
| 218088_s_at                                              | RRAGC                    | Ras-related GTP binding C                                                              |  |
| 218376_s_at                                              | MICAL1                   | microtubule associated monooxygenase, calponin and LIM domain containing 1             |  |
| 218700_s_at                                              | RAB7L1                   | RAB7, member RAS oncogene family-like 1                                                |  |
| 219257_s_at                                              | SPHK1                    | sphingosine kinase 1                                                                   |  |
| 220254_at                                                | LRP12                    | low density lipoprotein-related protein 12                                             |  |
| 222288_at                                                | PPP4R2                   | protein phosphatase 4, regulatory subunit 2                                            |  |
| 44702_at                                                 | SYDE1                    | synapse defective 1, Rho GTPase, homolog 1 (C. elegans)                                |  |
| 58780_s_at                                               | FLJ10357                 | NA                                                                                     |  |

| <b>Pentostatin, Cyclophosphamide, and Rituximab (PCR) Signature</b> |             |                                                                                           |
|---------------------------------------------------------------------|-------------|-------------------------------------------------------------------------------------------|
| <b>Upregulated probes with PCR resistance (early progression)</b>   |             |                                                                                           |
| U133A ID                                                            | Gene Symbol | Gene Name                                                                                 |
| 201014_s_at                                                         | PAICS       | phosphoribosylaminoimidazole carboxylase, phosphoribosylaminoimidazole succinocarboxamide |
| 201063_at                                                           | RCN1        | reticulocalbin 1, EF-hand calcium binding domain                                          |
| 201427_s_at                                                         | SEPP1       | selenoprotein P, plasma, 1                                                                |
| 202306_at                                                           | POLR2G      | polymerase (RNA) II (DNA directed) polypeptide G                                          |
| 202737_s_at                                                         | LSM4        | LSM4 homolog, U6 small nuclear RNA associated (S. cerevisiae)                             |
| 203756_at                                                           | ARHGEF17    | Rho guanine nucleotide exchange factor (GEF) 17                                           |
| 204223_at                                                           | PRELP       | proline/arginine-rich end leucine-rich repeat protein                                     |
| 204431_at                                                           | TLE2        | transducin-like enhancer of split 2 (E(sp1) homolog, Drosophila)                          |
| 204985_s_at                                                         | TRAPPC6A    | trafficking protein particle complex 6A                                                   |
| 205549_at                                                           | PCP4        | Purkinje cell protein 4                                                                   |
| 206030_at                                                           | ASPA        | aspartoacylase (Canavan disease)                                                          |
| 206162_x_at                                                         | SYT5        | synaptotagmin V                                                                           |
| 206548_at                                                           | FLJ23556    | NA                                                                                        |
| 206602_s_at                                                         | HOXD3       | homeobox D3                                                                               |
| 207337_at                                                           | CTAG2       | cancer/testis antigen 2                                                                   |
| 208526_at                                                           | OR2F1       | olfactory receptor, family 2, subfamily F, member 1                                       |
| 209398_at                                                           | HIST1H1C    | histone 1, H1c                                                                            |
| 209971_x_at                                                         | JTV1        | NA                                                                                        |
| 210997_at                                                           | HGF         | hepatocyte growth factor (hepapoietin A; scatter factor)                                  |
| 211135_x_at                                                         | LILRB3      | leukocyte immunoglobulin-like receptor, subfamily B (with TM and ITIM domains), member 3  |
| 211153_s_at                                                         | TNFSF11     | tumor necrosis factor (ligand) superfamily, member 11                                     |
| 211416_x_at                                                         | GGTLA4      | gamma-glutamyltransferase-like activity 4                                                 |
| 212736_at                                                           | C16orf45    | chromosome 16 open reading frame 45                                                       |
| 213569_at                                                           | VASH1       | vasohibin 1                                                                               |
| 213610_s_at                                                         | KLHL23      | kelch-like 23 (Drosophila)                                                                |
| 215242_at                                                           | PIGC        | phosphatidylinositol glycan anchor biosynthesis, class C                                  |
| 216352_x_at                                                         | PCDHGA3     | protocadherin gamma subfamily A, 3                                                        |
| 217490_at                                                           | NA          | NA                                                                                        |
| 218977_s_at                                                         | TRSPAP1     | tRNA selenocysteine associated protein 1                                                  |
| 219536_s_at                                                         | ZFP64       | zinc finger protein 64 homolog (mouse)                                                    |
| 220365_at                                                           | ALLC        | allantoicase                                                                              |
| 220920_at                                                           | ATP10B      | ATPase, Class V, type 10B                                                                 |
| 221057_at                                                           | SPATA1      | spermatogenesis associated 1                                                              |
| 222210_at                                                           | CASKIN2     | CASK interacting protein 2                                                                |
| 32625_at                                                            | NPR1        | natriuretic peptide receptor A/guanylate cyclase A (atrionatriuretic peptide receptor A)  |
|                                                                     |             |                                                                                           |
|                                                                     |             |                                                                                           |
|                                                                     |             |                                                                                           |
| <b>Downregulated probes with PCR resistance (early progression)</b> |             |                                                                                           |
| U133A ID                                                            | Gene Symbol | Gene Name                                                                                 |
| 201440_at                                                           | DDX23       | DEAD (Asp-Glu-Ala-Asp) box polypeptide 23                                                 |
| 204647_at                                                           | HOMER3      | homer homolog 3 (Drosophila)                                                              |
| 205405_at                                                           | SEMA5A      | sema domain, seven thrombospondin repeats (type 1 and type 1-like), transmembrane domain  |
| 205527_s_at                                                         | GEMIN4      | gem (nuclear organelle) associated protein 4                                              |
| 206006_s_at                                                         | KIAA1009    | KIAA1009                                                                                  |
| 206172_at                                                           | IL13RA2     | interleukin 13 receptor, alpha 2                                                          |
| 206233_at                                                           | B4GALT6     | UDP-Gal:betaGlcNAc beta 1,4- galactosyltransferase, polypeptide 6                         |
| 206798_x_at                                                         | DLEC1       | deleted in lung and esophageal cancer 1                                                   |
| 207016_s_at                                                         | ALDH1A2     | aldehyde dehydrogenase 1 family, member A2                                                |
| 207324_s_at                                                         | DSC1        | desmocollin 1                                                                             |
| 208537_at                                                           | EDG5        | endothelial differentiation, sphingolipid G-protein-coupled receptor, 5                   |
| 210375_at                                                           | PTGER3      | prostaglandin E receptor 3 (subtype EP3)                                                  |
| 210407_at                                                           | PPM1A       | protein phosphatase 1A (formerly 2C), magnesium-dependent, alpha isoform                  |
| 210745_at                                                           | ONECUT1     | one cut domain, family member 1                                                           |
| 211195_s_at                                                         | TP73L       | tumor protein p73-like                                                                    |
| 214514_at                                                           | MCM3AP      | MCM3 minichromosome maintenance deficient 3 (S. cerevisiae) associated protein            |
| 214619_at                                                           | CRHR1       | corticotropin releasing hormone receptor 1                                                |
| 215238_s_at                                                         | DOCK9       | dedicator of cytokinesis 9                                                                |
| 215922_at                                                           | REPS1       | RALBP1 associated Eps domain containing 1                                                 |
| 216146_at                                                           | NA          | NA                                                                                        |
| 216536_at                                                           | OR7E19P     | olfactory receptor, family 7, subfamily E, member 19 pseudogene                           |
| 216749_at                                                           | TRERF1      | transcriptional regulating factor 1                                                       |
| 220870_at                                                           | NA          | NA                                                                                        |
| 220906_at                                                           | NA          | NA                                                                                        |
| 221104_s_at                                                         | NIPSNAP3B   | nipsnap homolog 3B (C. elegans)                                                           |
|                                                                     |             |                                                                                           |
|                                                                     |             |                                                                                           |
|                                                                     |             |                                                                                           |
|                                                                     |             |                                                                                           |
