# Supplementary material
Source: PubMed Central journal article supplement (PMC2783430)
Supplement: NIHMS140337-supplement-2.pdf [file NIHMS140337-supplement-2.pdf]

| <b>Parameters and Information for Genomic Signatures</b>   |                            |                                |                         |           |             |             |       |      |
|------------------------------------------------------------|----------------------------|--------------------------------|-------------------------|-----------|-------------|-------------|-------|------|
| <b>Cell lines in Chlorambucil Signature</b>                |                            |                                |                         |           |             |             |       |      |
| Sensitive Cell Lines                                       | Resistant Cell Lines       |                                |                         |           |             |             |       |      |
| CNS:SF_539                                                 | BR:MCF7                    |                                |                         |           |             |             |       |      |
| CNS:SNB_75                                                 | CO:HCT_116                 |                                |                         |           |             |             |       |      |
| ME:LOXIMVI                                                 | CO:HT29                    |                                |                         |           |             |             |       |      |
| ME:MALME_3M                                                | LE:K_562                   |                                |                         |           |             |             |       |      |
| ME:M14                                                     | LE:RPMI_8226               |                                |                         |           |             |             |       |      |
| ME:SK_MEL_5                                                | LC:A549                    |                                |                         |           |             |             |       |      |
| ME:UACC_62                                                 | LC:NCI_H322M               |                                |                         |           |             |             |       |      |
| LC:HOP_92                                                  | OV:OVCAR_8                 |                                |                         |           |             |             |       |      |
| LC:NCI_H522                                                | OV:SK_OV_3                 |                                |                         |           |             |             |       |      |
| RE:786_0                                                   | PR:PC_3                    |                                |                         |           |             |             |       |      |
| RE:CAKI_1                                                  | PR:DU_145                  |                                |                         |           |             |             |       |      |
| RE:RXF_393                                                 | RE:TK_10                   |                                |                         |           |             |             |       |      |
| <b>Binary Regression Parameters for Genomic Signatures</b> |                            |                                |                         |           |             |             |       |      |
| <b>Training</b>                                            | Signature                  | Training Data Set              | Probes                  | Factors   | Burn-in     | Iterations  | Skips |      |
|                                                            | Progressive Disease        | Duke/VA                        | 180                     | 2         | 1000        | 5000        | 1     |      |
|                                                            | Chlorambucil Resistance    | NCI-60                         | 140                     | 4         | 1000        | 5000        | 1     |      |
|                                                            | PCR regimen Refractoriness | Mayo/Ohio State                | 60                      | 4         | 1000        | 5000        | 1     |      |
| <b>Validation/Application</b>                              | Signature                  | Validation Data Set            | Probes                  | Factors   | Burn-in     | Iterations  | Skips |      |
|                                                            | Progressive Disease        | Spanish National Cancer Centre | 180                     | 2         | 1000        | 5000        | 1     |      |
|                                                            | Progressive Disease        | NCI                            | 140                     | 4         | 1000        | 5000        | 1     |      |
|                                                            | Chlorambucil Resistance    | Duke/VA                        | 140                     | 4         | 1000        | 5000        | 1     |      |
|                                                            | PCR regimen Refractoriness | Mayo/Ohio State                | 60                      | 4         | 1000        | 5000        | 1     |      |
| <b>Predictive Ability of Genomic Signatures</b>            |                            |                                |                         |           |             |             |       |      |
| <b>Training</b>                                            | Signature                  | Training Data Set              | Platform                | N samples | Sensitivity | Specificity | PPV   | NPV  |
|                                                            | Progressive Disease        | Duke/VA                        | Affymetrix U133Plus 2.0 | 61        | 64%         | 67%         | 62%   | 69%  |
|                                                            | Chlorambucil Resistance    | NCI-60                         | Affymetrix U133A        | 24        | 100%        | 92%         | 92%   | 100% |
|                                                            | PCR regimen Refractoriness | Mayo/Ohio State                | Affymetrix U133A        | 20        | 80%         | 80%         | 80%   | 80%  |
| <b>Validation</b>                                          | Signature                  | Validation Data Set            | Platform                | N samples | Sensitivity | Specificity | PPV   | NPV  |
|                                                            | Progressive Disease        | Spanish National Cancer Centre | cDNA array              | 160       | 60%         | 71%         | 71%   | 60%  |
|                                                            | Progressive Disease        | NCI                            | cDNA array              | 107       | 66%         | 62%         | 39%   | 83%  |
