# Supplementary material
Source: PubMed Central journal article supplement (PMC2783430)
Supplement: NIHMS140337-supplement-3.pdf [file NIHMS140337-supplement-3.pdf]

| Group                                                                      | TTT (years) | Rx | IgVH | CD38 | ZAP70 | Cytogenetics | Treatment *            |
|----------------------------------------------------------------------------|-------------|----|------|------|-------|--------------|------------------------|
| Stable                                                                     | 10.21       | N  | M    | Neg  | Neg   | Normal       | none                   |
| Stable                                                                     | 8.02        | N  | M    | Neg  | Pos   | Normal       | none                   |
| Stable                                                                     | 7.47        | N  | M    | Neg  | Pos   | 13q14del     | none                   |
| Stable                                                                     | 13.46       | N  | M    | Neg  | Pos   | 13q14del     | none                   |
| Stable                                                                     | 6.47        | N  | M    | Pos  | NA    | Normal       | none                   |
| Stable                                                                     | 14.16       | N  | M    | Neg  | Pos   | NA           | none                   |
| Stable                                                                     | 6.43        | N  | M    | Neg  | Pos   | Normal       | none                   |
| Stable                                                                     | 6.1         | N  | M    | Pos  | Pos   | Normal       | none                   |
| Stable                                                                     | 20.05       | N  | M    | Neg  | Pos   | Complex      | none                   |
| Stable                                                                     | 7.84        | N  | M    | Neg  | Neg   | NA           | none                   |
| Stable                                                                     | 5.15        | N  | M    | Neg  | Pos   | 13q14del     | none                   |
| Stable                                                                     | 5.07        | N  | M    | Neg  | Pos   | 13q14del     | none                   |
| Stable                                                                     | 5.33        | N  | M    | Neg  | Pos   | 13q14del     | none                   |
| Stable                                                                     | 5.96        | N  | M    | Neg  | Neg   | Complex      | none                   |
| Stable                                                                     | 1.33        | N  | M    | Neg  | Neg   | NA           | none                   |
| Stable                                                                     | 3.81        | N  | M    | Neg  | Neg   | NA           | none                   |
| Stable                                                                     | 24.39       | N  | U    | Neg  | Pos   | NA           | none                   |
| Stable                                                                     | 9.8         | N  | NA   | Neg  | Pos   | NA           | none                   |
| Stable                                                                     | 4.15        | N  | M    | Neg  | Neg   | NA           | none                   |
| Stable                                                                     | 0.42        | N  | M    | Neg  | Pos   | NA           | none                   |
| Stable                                                                     | 3.67        | N  | M    | Neg  | Neg   | 13q14del     | none                   |
| Stable                                                                     | 0.71        | N  | M    | Neg  | Pos   | 17pdel       | none                   |
| Stable                                                                     | 16.62       | N  | M    | NA   | Pos   | NA           | none                   |
| Stable                                                                     | 16.91       | N  | M    | Neg  | Pos   | Normal       | none                   |
| Stable                                                                     | 17.63       | N  | U    | Neg  | Pos   | Complex      | none                   |
| Stable                                                                     | 1.28        | N  | M    | Pos  | Neg   | NA           | none                   |
| Stable                                                                     | 2.42        | N  | M    | Neg  | Neg   | NA           | none                   |
| Stable                                                                     | 4.01        | N  | U    | Neg  | Pos   | 11qdel       | none                   |
| Stable                                                                     | 1.91        | N  | U    | Neg  | Pos   | NA           | none                   |
| Stable                                                                     | 2.19        | N  | U    | Neg  | Pos   | NA           | none                   |
| Stable                                                                     | 2.01        | N  | U    | Neg  | Pos   | Tri 12       | none                   |
| Stable                                                                     | 1.29        | N  | U    | Neg  | NA    | Complex      | none                   |
| Stable                                                                     | 2.22        | N  | U    | Pos  | NA    | NA           | none                   |
| Progressive                                                                | 2.92        | Y  | U    | Neg  | Pos   | 13q14del     | C/P, FCR               |
| Progressive                                                                | 2.5         | Y  | U    | Neg  | Pos   | 17pdel       | C, FCR                 |
| Progressive                                                                | 6.57        | Y  | M    | Neg  | Pos   | NA           | C                      |
| Progressive                                                                | 2.08        | Y  | M    | Neg  | Pos   | 13q14del     | C                      |
| Progressive                                                                | 1.6         | Y  | M    | Pos  | Pos   | Normal       | FR, C                  |
| Progressive                                                                | 2.29        | Y  | M    | Neg  | Neg   | 13q14del     | C/P                    |
| Progressive                                                                | 0.26        | Y  | NA   | Neg  | Pos   | NA           | R-CHOP, FR, FCR, ESHAP |
| Progressive                                                                | 3.21        | Y  | U    | Neg  | Pos   | 13q14del     | C, FCR                 |
| Progressive                                                                | 5.18        | Y  | U    | Neg  | Neg   | NA           | C/P                    |
| Progressive                                                                | 3.32        | Y  | M    | Neg  | Pos   | NA           | C                      |
| Progressive                                                                | 11.91       | Y  | M    | Neg  | Pos   | 13q14del     | C                      |
| Progressive                                                                | 3.9         | Y  | U    | Neg  | Pos   | Normal       | C                      |
| Progressive                                                                | 2.51        | Y  | M    | Neg  | Pos   | 13q14del     | C                      |
| Progressive                                                                | 0.42        | Y  | U    | Pos  | Pos   | Complex      | C, R, FR, A            |
| Progressive                                                                | 1           | Y  | U    | Neg  | Neg   | Tri 12       | FR                     |
| Progressive                                                                | 1.41        | Y  | M    | Pos  | Pos   | Normal       | C                      |
| Progressive                                                                | 3.87        | Y  | M    | Neg  | Neg   | 13q14del     | C                      |
| Progressive                                                                | 0.92        | Y  | U    | Neg  | Pos   | 13q14del     | R                      |
| Progressive                                                                | 0.73        | Y  | M    | Pos  | Neg   | Normal       | FR                     |
| Progressive                                                                | 0.27        | Y  | U    | Pos  | Pos   | 13q14del     | FCR                    |
| Progressive                                                                | 0.86        | Y  | U    | Pos  | Pos   | Normal       | R-CHOP                 |
| Progressive                                                                | 0.13        | Y  | U    | Neg  | Neg   | Tri 12       | R, C                   |
| Progressive                                                                | 7.31        | Y  | U    | Pos  | Pos   | Tri 12       | C                      |
| Progressive                                                                | 2.21        | Y  | U    | Pos  | Pos   | Tri 12       | C/P                    |
| Progressive                                                                | 4.35        | Y  | U    | NA   | NA    | Complex      | R-CVP, R, PCR, A       |
| Progressive                                                                | 0.05        | Y  | U    | NA   | NA    | Normal       | C/P, R                 |
| Progressive                                                                | 6.12        | Y  | M    | Neg  | Neg   | Tri 12       | PCR                    |
| Progressive                                                                | 3.99        | Y  | NA   | Pos  | Pos   | Complex      | FR                     |
|                                                                            |             |    |      |      |       |              |                        |
|                                                                            |             |    |      |      |       |              |                        |
|                                                                            |             |    |      |      |       |              |                        |
| * Treatment Abreviations                                                   |             |    |      |      |       |              |                        |
| C = chlorambucil                                                           |             |    |      |      |       |              |                        |
| C/P = chlorambucil/prednisone                                              |             |    |      |      |       |              |                        |
| FCR = fludarabine, cyclophosphamide, rituximab                             |             |    |      |      |       |              |                        |
| PCR = pentostatin, cyclophosphamide, rituximab                             |             |    |      |      |       |              |                        |
| FR = fludarabine, rituximab                                                |             |    |      |      |       |              |                        |
| R-CHOP = rituximab, cyclophosphamide, vincristine, doxorubicin, prednisone |             |    |      |      |       |              |                        |
| R-CVP = rituximab, cyclophosphamide, vincristine, prednisone               |             |    |      |      |       |              |                        |
| ESHAP = etoposide, cytarabine, cisplatin, methylprednisolone               |             |    |      |      |       |              |                        |
| R = rituximab                                                              |             |    |      |      |       |              |                        |
| A = alemtuzumab                                                            |             |    |      |      |       |              |                        |
